# Supplementary material for: Gene expression patterns during adaptation of a helminth parasite to different environmental niches
Source: PubMed Central journal article supplement (PMC1896014; doi:10.1186/gb-2007-8-4-r65), 2007-04-24
Supplement: gb-2007-8-4-r65-S5.pdf [file gb-2007-8-4-r65-S5.pdf]

## **CLUSTER 1**

TC14426 "weakly similar to autoantigen {Rhipicephalus appendiculatus}, partial (29%) "

TC16551 "similar to 90-kDa heat shock protein {Sus scrofa}, partial (34%) "

TC10537 "homologue to similar to GenBank Accession Number L24368 ribosomal protein S4 in Gallus gallus, complete"

TC11203 "weakly similar to CG6090-PA {Drosophila melanogaster}, partial (62%) "

TC10531 "similar to Probable dynein light chain 1 cytoplasmic. {Caenorhabditis elegans}, partial (95%) "

TC6866 "similar to similar to GenBank Accession Number U54584 histone H1 in Schistosoma mansoni {Schistosoma japonicum}, partial (81%) "

TC16809 "homologue to similar to HMG1-like protein - fruit fly {Schistosoma japonicum}, complete"

TC17950 "weakly similar to nucleolar protein family A member 2 {Branchiostoma belcheri}, partial (34%) "

TC10532 "similar to Probable dynein light chain 1 cytoplasmic. {Caenorhabditis elegans}, partial (66%) "

TC10986 "similar to 40S ribosomal protein S17. [Human], partial (78%) "

TC9217 "weakly similar to cathepsin L-like cysteine proteinase {Tenebrio molitor}, partial (36%) "

TC12156

TC12464

TC15675 "homologue to hypothetical protein JC8.7 - Caenorhabditis elegans, partial (3%) "

TC16530

TC17720 "similar to putative high mobility group-like nuclear protein 2 {Echinococcus multilocularis}, partial (87%) "

TC13362 "homologue to 40S ribosomal protein S14. {Podocoryne carnea}, partial (82%) "

TC18225 "similar to Threonyl-tRNA synthetase cytoplasmic (EC 6.1.1.3) (Threonine--tRNA ligase) (ThrRS)., partial (29%) "

TC13769 "weakly similar to Similar to chromosome 1 open reading frame 6 {Xenopus laevis}, partial (29%) "

TC17617

TC15994 "weakly similar to Unknown (protein for IMAGE:3139787) {Homo sapiens}, partial (12%) "

TC10676 "homologue to NADH dehydrogenase subunit 3 {Schistosoma mansoni}, complete"

TC16641 "homologue to elongation factor 1-alpha {Schistosoma mansoni}, partial (26%) "

TC13505 "homologue to AUT1 {Schistosoma mansoni}, complete"

TC6879

TC7399 "homologue to cytochrome c oxidase subunit 2 {Schistosoma mansoni}, complete"

TC10437 "protein disulfide-isomerase homolog precursor - fluke (Schistosoma mansoni), complete"

TC16813 "calmodulin {Caenorhabditis elegans}, complete"

TC8967 "homologue to unnamed protein product {Mus musculus}, partial (2%) "

TC14370

TC8464 "similar to ribosomal protein L29 {Sus scrofa}, partial (55%) "

TC10545 "homologue to similar to NM\_080743 serine-arginine repressor protein (35 kDa) in Homo sapiens, partial (97%) "

TC11522

TC16682 "similar to Stress-70 protein mitochondrial precursor (75 kDa glucose regulated protein) (GRP 75), partial (89%) "

TC16569

TC18752

TC17205 "weakly similar to G2/mitotic-specific cyclin 3. [Baker's yeast], partial (12%) "

TC7433

TC10394 "weakly similar to troponin I {Mizuhopecten yessoensis}, partial (10%) "

TC10701 "similar to C. elegans RPS-26 protein (corresponding sequence F39B2.6) {Caenorhabditis elegans}, partial (50%) "

TC17063 "similar to Unknown (protein for MGC:56007) {Danio rerio}, partial (6%) "

TC16381

TC16859 "similar to ADP ATP carrier protein (ADP/ATP translocase) (Adenine nucleotide translocator) (ANT)., partial (51%) "

TC18051 "weakly similar to tetraspanin TE736 {Schistosoma japonicum}, partial (16%) "

TC16555 "weakly similar to ORF 73 contains large complex repeat CR 73 {Human herpesvirus 8}, partial (4%) "

TC7697 "weakly similar to BH3184~unknown conserved protein {Bacillus halodurans}, partial (23%) "

TC10538 "homologue to similar to GenBank Accession Number L24368 ribosomal protein S4 in Gallus gallus, partial (55%) "

TC9225

TC8781 "weakly similar to Unknown (protein for MGC:27818) {Mus musculus}, partial (44%) "

TC10488 "similar to NM\_079796 Ribonuclear protein at 97D in Drosophila melanogaster {Schistosoma japonicum}, partial (39%) "

TC13660 "homologue to similar to GenBank Accession Number BC016558 ribosomal protein L23a {Schistosoma japonicum}, partial (90%) "

TC16795

TC10606 "similar to UNKNOWN PROTEIN {Lactococcus lactis subsp. lactis}, partial (1%) "

TC16850 "similar to 40S ribosomal protein S13. [Pig], partial (48%) "

TC16572

TC8719 "similar to cytochrome c oxidase subunit I {Roboastra europaea}, partial (46%) "

TC15835

TC13786 "similar to no similar protein found {Silene latifolia subsp. alba}, partial (7%) "

TC8344

TC10515

TC15564 "similar to histone H2A - spoonworm (Urechis caupo), partial (92%) "

TC16964 "weakly similar to Peripheral-type benzodiazepine receptor (PBR) (PKBS) (Mitochondrial benzodiazepine receptor)., partial (21%) "

TC17224 "weakly similar to hypothetical protein ZK783.2 - Caenorhabditis elegans, partial (6%) "

TC7508 "weakly similar to unnamed protein product {Mus musculus}, partial (63%) "

TC17223 "weakly similar to hypothetical protein ZK783.2 - Caenorhabditis elegans, partial (6%) "

TC19626 "weakly similar to cytochrome c oxidase subunit III {Roboastra europaea}, partial (52%) "

TC6887 "similar to gag-pol polyprotein {Clonorchis sinensis}, partial (3%) "

TC13374 "similar to 40S ribosomal protein {Perinereis aibuhitensis}, partial (74%) "

TC17248

TC16678 "Glyceraldehyde 3-phosphate dehydrogenase (EC 1.2.1.12) (GAPDH) (Major larval surface antigen) (P-37), complete"

TC16546 "Heat shock 70 kDa homolog protein (HSP70) (Major surface antigen). [Blood fluke], partial (17%) "

TC6865 "homologue to celldextrinase C - Pseudomonas fluorescens, partial (2%) "

TC7896

TC10354 "similar to similar to GenBank Accession Number M94390 HEXBP DNA binding protein in Leishmania major, partial (77%) "

TC10536 "similar to ribosomal protein L4 cytosolic [validated] - rat, partial (50%) "

TC10527 "homologue to dynein light chain 2 {Mus musculus}, complete"

TC7569 "T-complex protein 1 alpha subunit (TCP-1-alpha) (CCT-alpha). [Blood fluke], complete"

TC11197 "similar to Probable microsomal signal peptidase 25 kDa subunit (EC 3.4.-.-) (SPase 25 kDa subunit) (SPC25), partial (10%) "

TC16721 "weakly similar to pre-mRNA splicing SRp75 - human, partial (32%) "

TC6881 "similar to Similar to chromobox homolog 1 (Drosophila HP1 beta) {Danio rerio}, partial (53%) "

TC16140 "weakly similar to SD06874p {Drosophila melanogaster}, partial (6%) "

TC7484 "weakly similar to Similar to chaperonin containing TCP1 subunit 8 (theta) {Xenopus laevis}, partial (60%) "

TC16605 "similar to hypothetical protein {Plasmodium falciparum 3D7}, partial (0%) "

TC11576 "ribosomal protein L37 {Schistosoma mansoni}, complete"

TC10529 "similar to Probable dynein light chain 1 cytoplasmic. {Caenorhabditis elegans}, partial (95%) "

TC8614 "similar to RE07451p {Drosophila melanogaster}, partial (81%) "

TC7314 "homologue to cytochrome c oxidase subunit 1 {Schistosoma mansoni}, partial (28%) "

TC8560 "weakly similar to putative 60S RIBOSOMAL PROTEIN L36 {Oryza sativa (japonica cultivar-group)}, partial (58%) "

TC10547 "homologue to ribosomal protein S8 {Schistosoma japonicum}, complete"

TC16630 "similar to protein T6D22.2 [imported] - Arabidopsis thaliana, partial (16%) "

TC17564 "similar to Unknown protein for MGC:56459 {Danio rerio}, partial (67%) "

TC11170 "similar to Usmg5 protein {Mus musculus}, partial (31%) "

TC17090 "weakly similar to 40S ribosomal protein S21 {Ictalurus punctatus}, partial (54%) "

TC16972 "similar to phosphate carrier protein precursor mitochondrial splice form B - bovine, partial (81%) "

TC17388 "similar to ribosomal protein S15a {Taenia solium}, complete"

TC16739 "14-3-3 protein homolog 1. [Blood fluke], partial (31%) "

TC7713 "similar to ribosomal protein S14 - mouse, partial (88%) "

TC16732 "weakly similar to DnaJ-like protein {Cercopithecus aethiops}, partial (76%) "

TC10736 "homologue to similar to GenBank Accession Number AJ312339 putative ribosomal protein L27A protein in, complete"

TC16803 "weakly similar to ribosomal protein L6 {Ictalurus punctatus}, partial (49%) "

TC7475 "similar to 60S ribosomal protein L8. [Rat], partial (97%) "

TC11590 "ubiquitin/ribosomal fusion protein {Schistosoma japonicum}, complete"

TC7403 "similar to 60S ribosomal protein L30. [Amphioxius], partial (92%) "

TC16897 "similar to Unknown protein for MGC:11850 {Mus musculus}, partial (25%) "

TC7478 "similar to ribosomal protein S25 {Branchiostoma belcheri}, partial (72%) "

TC11327 "weakly similar to 40S ribosomal protein S12. {Cyanophora paradoxa}, partial (72%) "

TC6874 "similar to GM02242p {Drosophila melanogaster}, partial (72%) "

TC7041 "weakly similar to ribosomal protein L7a cytosolic - chicken, partial (86%) "

TC17430

TC7437 "weakly similar to cisplatin resistance-associated overexpressed protein {Homo sapiens}, partial (19%) "

## **CLUSTER 2**

TC10486 "Glutathione S-transferase 28 kDa (EC 2.5.1.18) (GST 28) (SM28 antigen) (Protective 28 kDa antigen), complete"

TC13533 "homologue to similar to GenBank Accession Number AY072287 ribosomal protein L3 Schistosoma japonicum}, complete"

TC13852 "similar to ribosomal protein S18 {Branchiostoma belcheri}, partial (92%) "

TC10912 "similar to ribosomal protein L17A - fruit fly (Drosophila melanogaster), partial (97%) "

TC16808 "weakly similar to ribosome-associated protein P40 {Bombyx mori}, partial (59%) "

TC11169 "similar to Usmg5 protein {Mus musculus}, partial (41%) "

TC17069 "weakly similar to 60S ribosomal protein L35 {Euphorbia esula}, partial (47%) "

TC13971 "Glutathione S-transferase 26 kDa (EC 2.5.1.18) (GST 26) (SM26/2 antigen) (GST class-alpha), partial (94%) "

TC14946

TC16078 "similar to 60S ribosomal protein L11. [Rat], partial (76%) "

TC11413 "similar to nucleoside diphosphate kinase {Schistosoma japonicum}, partial (94%) "

TC13523 "homologue to similar to GenBank Accession Number S41224 hnRNP protein in Xenopus laevis {Schistosoma japonicum}, partial (36%) "

TC7098 "similar to 40S ribosomal protein S24. [Japanese pufferfish Takifugu rubripes], partial (78%) "

TC7444

TC13573 "23 kDa integral membrane protein (SM23). [Blood fluke], complete"

TC13698 "40S rRNA protein homolog {Schistosoma mansoni}, complete"

TC16743 "CG11624-PA {Drosophila melanogaster}, partial (33%) "

TC10432 "similar to CG3395-PA {Drosophila melanogaster}, partial (92%) "

TC7295

TC16643 "homologue to elongation factor 1-alpha {Schistosoma mansoni}, partial (40%) "

TC17433 "homologue to similar to GenBank Accession Number X71081 ribosomal protein S8 in Xenopus laevis, complete"

TC13607 "similar to Similar to ribosomal protein L13a {Xenopus laevis}, partial (61%) "

TC8131 "similar to 40S ribosomal protein S11. [Rat], partial (74%) "

TC7643 "weakly similar to ribosomal protein L14 {Spodoptera frugiperda}, partial (35%) "  
 TC10528 "Probable dynein light chain (T-cell-stimulating antigen SM10). [Blood fluke], complete"  
 TC10700 "similar to C. elegans RPS-26 protein (corresponding sequence F39B2.6) {Caenorhabditis elegans}, partial (79%) "  
 TC16547 "similar to heat shock protein 90 {Dendronephthya klunzingeri}, partial (83%) "  
 TC14141 "weakly similar to similar to GenBank Accession Number Z98600 cofilin in Schizosaccharomyces pombe, partial (32%) "  
 TC7377 "similar to Y-box binding protein {Schistosoma mansoni}, partial (46%) "  
 TC17080 "weakly similar to ribosomal protein L18 {Petromyzon marinus}, complete"  
 TC10506 "homologue to similar to GenBank Accession Number L78668 60S ribosomal protein L5A {Schistosoma japonicum}, complete"  
 TC7748 "weakly similar to ribosomal protein L21 {Argopecten irradians}, partial (89%) "  
 TC17017 "homologue to hypothetical protein {Schistosoma japonicum}, complete"  
 TC17261 "weakly similar to hypothetical protein T13H5.2 - Caenorhabditis elegans, partial (14%) "  
 TC10617 "similar to ubiquitin {Ciona savignyi}, partial (49%) "  
 TC16537 "Heat shock 70 kDa homolog protein (HSP70) (Major surface antigen). [Blood fluke], complete"  
 TC10668 "similar to similar to NM\_058275 probable 60S ribosomal protein L7 in Caenorhabditis elegans, partial (95%) "  
 TC7421 "similar to Cs1 protein {Schistosoma japonicum}, partial (82%) "  
 TC16827 "homologue to similar to NM\_006276 splicing factor arginine/serine-rich 7 {Schistosoma japonicum}, partial (70%) "  
 TC17770 "phosphatidylinositol-4-phosphate 5-kinase putative {Plasmodium falciparum 3D7}, partial (0%) "  
 TC7096 "homologue to similar to GenBank Accession Number U30454 ribosomal protein S2 in Urechis caupo, partial (93%) "  
 TC10570 "weakly similar to hypothetical protein putative Profilin/allergen {Schistosoma japonicum}, partial (29%) "  
 TC17455 "similar to GrpE protein homolog mitochondrial precursor. [Fission yeast], partial (8%) "  
 TC8574 "similar to Small nuclear ribonucleoprotein SM D3 (snRNP core protein D3) (SM- D3). [Fruit fly], partial (55%) "  
 TC16552 "homologue to heat shock protein 86 - fluke (Schistosoma mansoni) (fragment), partial (53%) "  
 TC13511 "homologue to AUT1 {Schistosoma mansoni}, partial (46%) "  
 TC7420 "similar to Cs1 protein {Schistosoma japonicum}, partial (96%) "  
 TC10452 "homologue to similar to NM\_078658 40S ribosomal protein S5 {Schistosoma japonicum}, partial (92%) "  
 TC10473 "weakly similar to SET protein (HLA-DR associated protein II) (PHAPII) (Phosphatase 2A inhibitor I2PP2A). [Human], partial (68%) "  
 TC10682 "weakly similar to RE30690p {Drosophila melanogaster}, partial (82%) "  
 TC8189 "similar to Dynein 8 kDa light chain flagellar outer arm. {Chlamydomonas reinhardtii}, partial (96%) "  
 TC11430 "thioredoxin {Schistosoma mansoni}, complete"  
 TC16738 "14-3-3 protein homolog 1. [Blood fluke], complete"  
 TC6863 "homologue to 14-3-3 protein homolog 1. [Blood fluke], partial (27%) "  
 TC16806 "similar to NADH dehydrogenase 6 {Schistosoma mansoni}, complete"  
 TC17271 "similar to Cd151 protein {Mus musculus}, partial (6%) "  
 TC16638 "weakly similar to protein T6D22.2 [imported] - Arabidopsis thaliana, partial (15%) "  
 TC16731 "weakly similar to DnaJ homolog subfamily A member 4 (MmDjA4). [Mouse], partial (33%) "  
 TC16794 "thioredoxin peroxidase {Schistosoma mansoni}, complete"  
 TC10691 "weakly similar to Ubiquitin-activating enzyme E1 1 (Poly(A)+ RNA transport protein 3). [Fission yeast], partial (4%) "  
 TC16584 "similar to Small nuclear ribonucleoprotein F (snRNP-F) (Sm protein F) (Sm-F) (SmF). [Mouse], partial (79%) "  
 TC7615 "similar to ATP synthase lipid-binding protein-like protein {Schistosoma japonicum}, complete"  
 TC11552 "homologue to cytochrome b {Schistosoma mansoni}, complete"  
 TC16792 "leucine-rich protein {Schistosoma mansoni}, complete"  
 TC7432  
 TC17148  
 TC8215 "weakly similar to CG7939-PC {Drosophila melanogaster}, partial (91%) "  
 TC10484 "homologue to Actin. [Pacific oyster], partial (18%) "  
 TC13521 "homologue to similar to GenBank Accession Number S41224 hnRNP protein in Xenopus laevis {Schistosoma japonicum}, partial (92%) "  
 TC6872 "similar to tubulin alpha chain - sea urchin (Paracentrotus lividus), partial (97%) "  
 TC18131 "60S ribosomal protein L37a (Fragment). [Blood fluke], complete"  
 TC14109 "homologue to similar to GenBank Accession Number AF004672 ribosomal protein L41 in Phaffia rhodozyma, complete"  
 TC16627 "Actin 2. [Blood fluke], partial (45%) "  
 TC16631 "homologue to elongation factor 1-alpha {Schistosoma mansoni}, complete"  
 TC10435 "similar to CG3395-PA {Drosophila melanogaster}, partial (86%) "  
 TC10483 "Actin 1. [Blood fluke], partial (50%) "  
 TC7447 "similar to Similar to ribosomal protein L18a {Xenopus laevis}, partial (94%) "  
 TC16645 "similar to elongation factor 1-alpha {Schistosoma mansoni}, partial (22%) "  
 TC6902 "weakly similar to Similar to ribosomal protein L10a {Xenopus laevis}, partial (58%) "  
 TC7040 "weakly similar to ribosomal protein L26 {Ictalurus punctatus}, partial (97%) "

### **CLUSTER 3**

TC10509  
 TC19220 "weakly similar to Unknown (protein for MGC:20781) {Homo sapiens}, partial (11%) "  
 TC13775 "Antigen SM21.7. [Blood fluke], complete"  
 TC16807 "homologue to NADH dehydrogenase 6 {Schistosoma mansoni}, complete"  
 TC14303 "homologue to ATPase subunit 6 {Schistosoma mansoni}, complete"  
 TC17303  
 TC11510  
 TC17477 "homologue to NADH dehydrogenase subunit 2 {Schistosoma mansoni}, complete"

TC16858 "similar to ADP/ATP carrier {Trypanosoma brucei brucei}, partial (57%) "  
 TC18675 "similar to similar to alpha-L-fucosidase {Schistosoma japonicum}, partial (31%) "  
 TC7477 "similar to pyruvate phosphate dikinase (pyruvate orthophosphate dikinase) [imported] - Agrobacterium, partial (1%) "  
 TC16782 "Enolase (EC 4.2.1.11) (2-phosphoglycerate dehydratase) (2-phospho-D- glycerate hydro-lyase)., complete"  
 TC11243 "similar to hypothetical protein {Plasmodium falciparum 3D7}, partial (5%) "  
 TC13475 "similar to JF-2 {Schistosoma japonicum}, partial (67%) "  
 TC9568 "similar to 60S ribosomal protein L13a (23 kDa highly basic protein). [Human], partial (77%) "  
 TC15827 "homologue to Similar to tubulin alpha 1 {Xenopus laevis}, partial (24%) "  
 TC10468  
 TC7792 "similar to PP2A inhibitor {Tetraodon fluviatilis}, partial (59%) "  
 TC16557 "myosin heavy chain - fluke (Schistosoma mansoni) (strain Brazilian LE), complete"  
 TC17193 "similar to NADH dehydrogenase subunit 4 {Schistosoma mansoni}, partial (26%) "  
 TC12604 "similar to hypothetical protein {Plasmodium falciparum 3D7}, partial (1%) "  
 TC8122 "homologue to unnamed protein product {Homo sapiens}, partial (6%) "  
 TC8149  
 TC10480 "elastase {Schistosoma mansoni}, partial (41%) "  
 TC13518 "homologue to NADH dehydrogenase subunit 1 {Schistosoma mansoni}, partial (96%) "  
 TC16747 "weakly similar to Hypothetical protein Y69A2AR.18a {Caenorhabditis elegans}, partial (61%) "  
 TC8436  
 TC12356  
 TC14659 "similar to RNA binding motif protein 8A {Homo sapiens}, partial (72%) "  
 TC7207 "similar to Tubulin alpha chain. [Eastern newt Triturus viridescens], partial (26%) "  
 TC13722 "homologue to NADH dehydrogenase subunit 5 {Schistosoma mansoni}, complete"  
 TC11778  
 TC7180 "homologue to similar to Dictyostelium discoideum (Slime mold). MYOM protein, partial (1%) "  
 TC17934 "similar to hypothetical protein {Plasmodium falciparum 3D7}, partial (0%) "  
 TC10090  
 TC8089 "weakly similar to Pyruvate kinase M2 isozyme (EC 2.7.1.40). [Rabbit], partial (23%) "  
 TC10872 "weakly similar to similar to HMG1-like protein - fruit fly {Schistosoma japonicum}, partial (85%) "  
 TC7584  
 TC17147 "similar to similar to human carbonyl reductase (NADPH) PIR Accession Number A61271; Method: conceptual, partial (55%) "  
 TC18149  
 TC17016 "stathmin-like protein {Schistosoma mansoni}, complete"  
 TC7095  
 TC7310 "homologue to cytochrome c oxidase subunit 1 {Schistosoma mansoni}, complete"  
 TC14660 "weakly similar to CG8781-PA {Drosophila melanogaster}, partial (86%) "  
 TC18151 "weakly similar to Unknown (protein for MGC:41267) {Mus musculus}, partial (84%) "  
 TC8661 "weakly similar to DC6 {Homo sapiens}, partial (71%) "  
 TC8910 "Tubulin beta-2 chain. [Fruit fly], partial (28%) "  
 TC14564 "homologue to Similar to adenosine kinase {Danio rerio}, partial (6%) "  
 TC17284 "similar to ATP synthase oligomycin sensitivity conferral protein mitochondrial precursor (EC 3.6.3.14) (OSCP)., partial (27%) "  
 TC7850 "similar to actin-filament fragmenting protein {Echinococcus granulosus}, partial (36%) "  
 TC7158 "similar to Fibrillarin. [Fission yeast], partial (13%) "  
 TC16860 "similar to ADP ATP carrier protein F2009.60 - Arabidopsis thaliana, partial (16%) "  
 TC7358 "similar to Importin alpha-3 subunit (Karyopherin alpha-3 subunit) (SRP1-gamma). [Human], partial (84%) "  
 TC12249 "weakly similar to Hypothetical protein C33H5.19 {Caenorhabditis elegans}, partial (16%) "

#### **CLUSTER 4**

TC11102 "similar to hypothetical protein F19B6.1a - Caenorhabditis elegans, partial (4%) "  
 TC14000 "similar to TPBF gene product {Acanthamoeba castellanii}, partial (4%) "  
 TC14763 "homologue to ribosomal protein S25 putative {Plasmodium falciparum 3D7}, partial (8%) "  
 TC13632 "unknown {Schistosoma mansoni}, complete"  
 TC13719  
 TC14617  
 TC17104 "weakly similar to tegumental protein {Schistosoma japonicum}, partial (42%) "  
 TC13565 "myosin light chain {Schistosoma mansoni}, complete"  
 TC13726  
 TC13534 "similar to unknown {Schistosoma mansoni}, partial (75%) "  
 TC14349 "similar to similar to XM\_082517 CG9399 gene product in Drosophila melanogaster {Schistosoma japonicum}, partial (94%) "  
 TC13727 "homologue to gag-pol polyprotein {Clonorchis sinensis}, partial (1%) "  
 TC7800 "similar to R07E5.13 protein (clone R07E5) - Caenorhabditis elegans, partial (45%) "  
 TC16878 "similar to Glycerol-3-phosphate dehydrogenase [NAD+] cytoplasmic (EC 1.1.1.8) (GPD-C) (GPDH-C)., partial (50%) "  
 TC16751 "homologue to similar to GenBank Accession Number AY044241 glutamine synthetase {Schistosoma japonicum}, complete"  
 TC17004 "homologue to similar to cytochrome c {Schistosoma japonicum}, complete"  
 TC10620  
 TC16870 "ATP:guanidino kinase SMC74 (EC 2.7.3.-) (ATP:guanidino phosphotransferase). [Blood fluke], partial (96%) "  
 TC8186  
 TC13516  
 TC8250  
 TC12523 "similar to NADH dehydrogenase subunit 4 {Schistosoma mansoni}, partial (36%) "

TC8935 "homologue to unknown {Homo sapiens}, partial (11%) "  
 TC17192 "homologue to NADH dehydrogenase subunit 4 {Schistosoma mansoni}, complete"  
 TC8821 "weakly similar to synapse associated protein 1 {Mus musculus}, partial (15%) "  
 TC7036 "similar to CCAAT-box DNA binding protein subunit B {Plasmodium falciparum}, partial (2%) "

#### **CLUSTER 5**

TC19377  
 TC13507 "similar to hypothetical protein Y66H1A.4 - Caenorhabditis elegans, partial (26%) "  
 TC16575 "major egg antigen {Schistosoma mansoni}, partial (21%) "  
 TC10348  
 TC11145  
 TC8654 "similar to Anti-Mullerian hormone type II receptor precursor (EC 2.7.1.37) (AMH type II receptor), partial (3%) "  
 TC10002  
 TC13584 "oj991113\_30.13 {Oryza sativa (japonica cultivar-group)}, partial (2%) "  
 TC6924 "similar to hypothetical protein {Macaca fascicularis}, partial (13%) "  
 TC14289  
 TC15088 "similar to KIAA0228 protein {Homo sapiens}, partial (16%) "  
 TC13882 "similar to 26S proteasome regulatory subunit {Dermacentor variabilis}, partial (94%) "  
 TC14265 "weakly similar to symbol=BG:DS00797.1; cDNA=method:"sim4" score:"1000.0" desc:"LD32761 LD Drosophila, partial (54%) "  
 TC13335  
 TC18006 "weakly similar to Hypothetical protein Y65B4A.3 {Caenorhabditis elegans}, partial (31%) "  
 TC15206 "similar to DEAD-box protein abstrakt. [Fruit fly], partial (12%) "  
 TC12788  
 TC14062 "homologue to similar to GenBank Accession Number AF063024 phosphate transporter 1 in Cricetulus griseus, partial (92%) "  
 TC18377 "weakly similar to gamma-filamin {Homo sapiens}, partial (2%) "  
 TC10246  
 TC11847 "weakly similar to unnamed protein product {Homo sapiens}, partial (21%) "  
 TC8528 "weakly similar to UGNT {Takifugu rubripes}, partial (17%) "  
 TC14726 "homologue to similar to Plasmodium falciparum (isolate 3D7). Hypothetical protein {Dictyostelium discoideum}, partial (2%) "  
 TC16965 "weakly similar to Glucosidase II {Homo sapiens}, partial (42%) "  
 TC8548 "similar to unnamed protein product {Mus musculus}, partial (10%) "  
 TC12261 "weakly similar to probable lipolytic enzyme PA5384 [imported] - Pseudomonas aeruginosa (strain PAO1), partial (22%) "  
 TC13485  
 TC16610 "similar to Hypothetical protein R193.3 {Caenorhabditis elegans}, partial (4%) "  
 TC16194 "similar to special lobe-specific silk protein ssp160A {Chironomus pallidivittatus}, partial (1%) "  
 TC12548  
 TC18339 "weakly similar to Similar to hypothetical protein DKFZp434B227 {Mus musculus}, partial (10%) "  
 TC7340 "homologue to This is the longest open reading frame of the sequence that starts with Met {Schistosoma mansoni}, complete"  
 TC10975 "similar to unnamed protein product {Homo sapiens}, partial (16%) "  
 TC10950 "weakly similar to carboxypeptidase gp180 - Anas sp., partial (6%) "  
 TC12139 "weakly similar to Alanyl-tRNA synthetase (EC 6.1.1.7) (Alanine--tRNA ligase) (AlaRS). [Human], partial (19%) "  
 TC18747 "similar to hypothetical protein {Schistosoma japonicum}, partial (91%) "  
 TC13659 "weakly similar to hypothetical protein {Plasmodium falciparum 3D7}, partial (2%) "  
 TC9257  
 TC15937  
 TC16854 "weakly similar to homologue of the murine Llg1h gene {Homo sapiens}, partial (3%) "  
 TC17255 "similar to hypothetical protein with Src homology 3, partial (54%) "  
 TC18001  
 TC7523 "similar to hypothetical protein {Schistosoma japonicum}, partial (93%) "  
 TC7710 "weakly similar to beta-1 2-N-acetylglucosaminyltransferase II {Sus scrofa}, partial (17%) "  
 TC13646 "similar to adaptor protein DAPP1 {Mus musculus}, partial (5%) "  
 TC17475 "homologue to hypothetical protein conserved {Plasmodium falciparum 3D7}, partial (6%) "  
 TC11505  
 TC13799  
 TC7884 "similar to similar to GenBank Accession Number AJ291614 actin related protein 2/3 protein complex subunit p16, complete"  
 TC15967 "similar to similar to GenBank Accession Number BC013428 PP1201 protein in Homo sapiens {Schistosoma japonicum}, partial (64%) "  
 TC19691  
 TC19645  
 TC18460  
 TC19414

#### **CLUSTER 6**

TC12502 "similar to hemochromatosis gene product HFE splice variant dele2 {Rattus norvegicus}, partial (5%) "  
 TC14160  
 TC13169 "similar to hypothetical protein {Pseudomonas syringae pv. tomato str. DC3000}, partial (17%) "  
 TC15581 "weakly similar to Dynamin-1 (EC 3.6.1.50) (Dynamin BREDNM19). [Mouse], partial (6%) "  
 TC11923  
 TC15484 "similar to hypothetical protein C09H6.a {Caenorhabditis elegans}, partial (9%) "

TC12198 "similar to mucin-like protein - Arabidopsis thaliana, partial (4%) "  
 TC8239  
 TC10897 "homologue to unknown {Schistosoma mansoni}, complete"  
 TC12085  
 TC16345 "homologue to Unknown (protein for MGC:16752) {Homo sapiens}, partial (5%) "  
 TC13351 "weakly similar to Similar to LOC132671 {Mus musculus}, partial (10%) "  
 TC14589 "similar to conserved hypothetical protein {Xanthomonas campestris pv. campestris str. ATCC 33913}, partial (3%) "  
 TC16176  
 TC15161  
 TC12228 "weakly similar to unknown {Homo sapiens}, partial (36%) "  
 TC14749 "weakly similar to Lor protein {Mus musculus}, partial (8%) "  
 TC12797 "weakly similar to probable membrane transport protein STY3643 [imported] - Salmonella enterica subsp. enterica, partial (15%) "  
 TC8196  
 TC13487 "homologue to Eggshell protein precursor (Chorion protein). [Blood fluke], partial (55%) "  
 TC14235 "weakly similar to cytochrome b5 {Ciona savignyi}, partial (54%) "  
 TC8804 "weakly similar to retinoid X receptor RXR-2 {Schistosoma mansoni}, partial (10%) "  
 TC7011 "similar to Putative retroelement {Oryza sativa} [Oryza sativa (japonica cultivar-group)], TC10861 "similar to  
 hypothetical protein {Bacillus megaterium}, complete"  
 TC12944  
 TC7536 "weakly similar to DjVLGA {Dugesia japonica}, partial (22%) "  
 TC12926  
 TC7139 "weakly similar to unnamed protein product {Homo sapiens}, partial (7%) "  
 TC11241 "similar to EST gblATTS1136 comes from this gene. {Arabidopsis thaliana}, partial (6%) "  
 TC18160  
 TC11291 "homologue to unnamed protein product {Mus musculus}, partial (8%) "  
 TC8175 "similar to EsV-1-103 {Ectocarpus siliculosus virus}, partial (3%) "  
 TC11826 "similar to similar to GenBank Accession Number AY070592 RE69393p in Drosophila melanogaster, partial (76%) "  
 TC14750  
 TC18406 "weakly similar to Stage V sporulation protein AD {Bacillus cereus ATCC 14579}, partial (10%) "  
 TC11986 "similar to HPHase {Homo sapiens}, partial (8%) "  
 TC11472  
 TC17501 "weakly similar to Beclin 1-like protein. [Fruit fly], partial (21%) "  
 TC7649 "similar to ras-related GTPase rag splice form A [imported] - human, partial (69%) "  
 TC8007 "similar to histone acetyltransferase Gcn5 putative {Plasmodium falciparum 3D7}, partial (0%) "  
 TC7019  
 TC7872 "weakly similar to Probable RNA 3'-terminal phosphate cyclase (EC 6.5.1.4) (RNA-3'-phosphate cyclase) (RNA cyclase)., partial  
 (16%) "  
 TC10194  
 TC10450 "weakly similar to unnamed protein product {Mus musculus}, partial (16%) "  
 TC12567  
 TC13457 "Eggshell protein precursor (Chorion protein). [Blood fluke], complete"  
 TC15060  
 TC11362 "similar to ankyrin G119 {Homo sapiens}, partial (5%) "  
 TC18166  
 TC12020 "similar to serine/threonine protein kinase (putative) {Lactobacillus plantarum WCFS1}, partial (2%) "  
 TC7509  
 TC13084  
 TC17669 "unknown {Arabidopsis thaliana}, partial (20%) "  
 TC18760  
 TC13492 "homologue to eggshell precursor protein {Schistosoma mansoni}, partial (26%) "  
 TC17000  
 TC16777 "homologue to Extracellular superoxide dismutase [Cu-Zn] precursor (EC 1.15.1.1) (EC-SOD). [Blood fluke], partial (95%) "  
 TC16781 "Extracellular superoxide dismutase [Cu-Zn] precursor (EC 1.15.1.1) (EC-SOD). [Blood fluke], partial (35%) "  
 TC10637 "weakly similar to Aquaporin 9 (Small solute channel 1). [Human], partial (20%) "  
 TC8004 "weakly similar to hypothetical protein {Shewanella oneidensis MR-1}, partial (15%) "  
 TC9163 "similar to Serine/threonine-protein kinase unc-51 (EC 2.7.1.-) (Uncoordinated protein 51)., partial (8%) "  
 TC11502  
 TC11963  
 TC16762  
 TC7005 "similar to putative senescence-associated protein {Pisum sativum}, partial (16%) "  
 TC11224 "unknown {Schistosoma mansoni}, complete"  
 TC6945  
 TC12088  
 TC18371  
 TC9012  
 TC18019  
 TC10526 "LGG {Schistosoma mansoni}, complete"  
 TC18790 "similar to transport protein [imported] - Sulfolobus solfataricus, partial (3%) "  
 TC10493 "cathepsin B1 isotype 1 {Schistosoma mansoni}, complete"  
 TC18412 "homologue to hypothetical protein FLJ10504 {Homo sapiens}, partial (3%) "

TC16817  
TC18007  
TC19260 "similar to Unknown protein {Arabidopsis thaliana}, partial (10%) "  
TC18066  
TC14869  
TC12296 "weakly similar to Laminin related protein 1 {Caenorhabditis elegans}, partial (2%) "  
TC8129 "similar to beta-1 4-galactosyltransferase {Gallus gallus}, partial (4%) "  
TC14899  
TC7105 "similar to lic2 product {Haemophilus influenzae}, partial (69%) "  
TC10898 "homologue to unknown {Schistosoma mansoni}, partial (72%) "  
TC18469 "similar to HPHase {Homo sapiens}, partial (8%) "  
TC9312  
TC16448  
TC19297  
TC19737 "similar to unknown protein {Arabidopsis thaliana}, partial (3%) "  
TC9870 "similar to Probable glutaminyl-tRNA synthetase (EC 6.1.1.18) (Glutamine--tRNA ligase) (GlnRS), partial (10%) "  
TC16289  
TC14156  
TC19434  
TC13658 "histone H3 - chicken, complete"  
TC19412  
TC9371  
TC10864 "weakly similar to putative ARM-1 protein {Gallus gallus}, partial (17%) "  
TC7206 "similar to extensin homolog T9E8.80 - Arabidopsis thaliana, partial (2%) "  
TC17058  
TC17188 "similar to hypothetical protein all7010 [imported] - Nostoc sp. (strain PCC 7120) plasmid pCC7120alpha, partial (3%) "  
TC17189  
TC18655 "similar to unnamed protein product {Homo sapiens}, partial (6%) "  
TC7194  
TC7563 "similar to polyprotein {Schistosoma japonicum}, partial (7%) "  
TC8997
